# Supplementary material for: Exploring the diversity and structural response of sediment-associated microbiota communities to environmental pollution at the siangshan wetland in Taiwan using environmental DNA metagenomic approach
Source: Frontiers journal article supplement (doi:10.3389/fmars.2022.990428), 2022-08-29
Supplement: Table_1.xlsx [file Table_1.xlsx]

## Sheet: Sheet1
Supplementary Table 8: Most abundant Taxa (> 1 % in all sequences across all sediment sites) in surface and sub-surface sites at Siangshan wetland. 13 Phyla, 18 Classes and Others.
ASVs	Kingdom	Phylum	Class	DJ1.F	DJ1.S	DJ2.F	DJ2.S	DJ3.F	DJ3.S	FC1.F	FC1.S	FC2.F	FC2.S	HM1.F	HM1.S	HM2.F	HM2.S	HS1.F	HS1.S	HS2.F	HS2.S	HS3.F	HS3.S	KW1.F	KW1.S	KW2.F	KW2.S	KY1.F	KY1.S	KY2.F	KY2.S	MA1.F	MA1.S	MA2.F	MA2.S	MA3.F	MA3.S	OB1.F	OB1.S	OB2.F	OB2.S	OB3.F	OB3.S	YK1.F	YK1.S	YK2.F	YK2.S	Total	%
1	Bacteria	Proteobacteria	Gammaproteobacteria	36235	25615	34615	25092	27537	25462	36275	18128	34409	22042	27258	18468	37390	10751	35715	18009	21828	21771	22629	8784	22477	11407	29544	20769	18298	8938	10733	14660	16903	32137	27657	18511	21647	10514	24880	21891	34176	20109	29699	20143	26127	18350	29808	15492	1012883	26.3738
2	Bacteria	Proteobacteria	Alphaproteobacteria	20233	7597	20620	8343	16287	7412	14300	5225	12264	3374	17230	4650	16331	4549	12533	3863	8845	6394	7268	3794	10529	2883	10276	6052	7504	7826	13067	11735	21228	16546	15379	11699	12101	7979	8283	7250	15703	6534	12690	7208	9913	10910	8666	4081	447154	11.6431
3	Bacteria	Bacteroidota	Bacteroidia	10250	3764	9925	2147	9977	2580	8472	3457	8984	2064	6742	1451	8166	1565	7825	3477	6483	5053	5025	1039	5875	946	8075	4308	7463	554	8440	769	31481	5611	8016	4517	10389	2739	11571	5729	10814	3119	11601	2209	10725	2339	8223	1820	275779	7.18083
4	Bacteria	Cyanobacteria	Cyanobacteriia	6428	648	6559	602	2837	105	6656	7662	5456	3166	6445	1869	5889	1330	12696	7079	11933	4518	5450	722	3846	905	4525	6051	622	252	837	184	34763	2819	1192	184	1514	111	9384	3260	4649	1893	6133	423	8281	1511	21432	11538	224359	5.84194
5	Bacteria	Actinobacteriota	Acidimicrobiia	5199	7119	7104	7969	5295	7347	6873	3033	6484	2244	3065	1312	3613	1338	7096	3200	5360	5098	2362	935	4369	2794	11203	12496	1053	3167	3423	4156	3406	5791	5130	2419	2159	1308	1817	2462	3414	2144	2248	1691	2507	899	8937	1457	182496	4.75189
6	Bacteria	Chloroflexota	Anaerolineae	3762	9826	3558	10590	2316	4099	2109	2439	1303	4291	1804	3040	2267	12931	1384	6008	568	3501	671	3537	1864	5299	1055	2210	886	773	369	3601	1467	11807	3008	18295	3551	7769	924	2866	867	4934	727	3395	1459	1120	940	1513	160703	4.18444
7	Bacteria	Planctomycetota	Planctomycetes	6414	7792	4601	5631	4802	11004	4775	2635	3183	1614	2872	1086	2617	2506	5032	1684	4093	1717	2378	1152	3922	3199	2826	1981	1396	4078	1763	4763	6119	7595	6107	3673	2872	3204	2387	4258	2842	3577	2184	3183	3015	1922	3687	1728	159869	4.16272
8	Archaea	Asgardarchaeota	Lokiarchaeia	2607	484	2608	196	1299	89	1618	4640	3513	3496	2323	1508	2078	2336	3665	1841	2673	946	5399	3304	1220	414	765	600	377	218	125	32	815	1228	321	136	382	80	29977	11090	15840	4535	28118	553	9064	1990	2341	2303	159147	4.14392
9	Bacteria	Desulfobacterota	Desulfobacteria	1063	1380	825	1336	898	525	1456	2255	1154	3803	706	2377	1520	6922	1519	4122	818	4015	736	4236	386	827	528	732	2962	291	233	1146	1257	9186	4043	12576	10151	11882	1054	2733	1104	4141	1190	4267	1804	1930	932	1864	118885	3.09557
10	Bacteria	Firmicutes	Clostridia	1845	2978	1620	2187	1364	3044	879	1209	1225	1072	674	2535	766	3229	1316	1405	798	1650	938	1037	1576	3266	553	549	3272	2309	434	915	1603	1631	2153	1938	2163	2608	2776	4353	3394	6434	3057	5127	12306	5331	2330	1008	102857	2.67823
11	Bacteria	Desulfobacterota	Desulfobulbia	2012	2332	1376	1011	1318	523	1293	1232	1427	1696	1285	1650	3313	2465	1107	1531	587	3910	1108	2044	398	1400	604	608	1431	294	244	712	1595	6427	6341	6912	5777	5357	1384	4184	2045	4905	1861	4848	2202	2618	1229	2087	98683	2.56954
12	Bacteria	Actinobacteriota	Actinomycetia	1158	1782	1179	1565	2082	1679	613	2248	710	4218	332	2785	261	1132	914	4654	582	672	265	302	1848	1057	1102	484	5278	3632	2032	1398	877	1728	2364	2935	4197	2259	1031	1561	1415	1742	1179	1303	1437	1658	1027	1391	74068	1.92861
13	Bacteria	Acidobacteriota	Thermoanaerobaculia	1856	2444	1668	2435	1473	2540	3698	943	3083	1447	1188	843	1781	892	3990	758	1352	2103	1151	1421	1231	970	1223	1022	441	570	461	964	668	2338	1478	2531	1015	1672	583	1138	868	1573	703	1942	553	975	1328	728	64041	1.66752
14	Bacteria	Gemmatimonadota	Gemmatimonadetes	1989	3715	2558	4223	2316	4175	1806	618	1448	753	1286	553	1274	744	1866	980	973	1519	575	691	1514	1501	1659	1288	218	838	1086	1760	650	3319	1419	1800	585	827	543	1124	1062	1572	561	1979	639	950	1369	635	62960	1.63937
15	Bacteria	Desulfobacterota	Desulfuromonadia	3037	638	2572	569	2266	352	758	430	760	513	1667	409	2618	1091	661	245	352	1181	522	651	385	545	304	218	759	217	319	438	501	1517	1634	3007	1593	958	2093	1799	2914	2154	2050	1897	2405	584	426	229	50238	1.30811
16	Bacteria	Myxococcota	Polyangia	1122	1652	1359	1731	936	2038	1112	957	1037	567	514	494	662	489	1779	616	1271	908	666	278	803	397	931	686	304	623	463	1235	1174	2477	2920	1085	1244	1338	508	1046	943	1587	800	3232	721	784	1077	430	46996	1.2237
17	Archaea	Halobacteriota	Halobacteria	2958	6145	3990	7807	10215	3268	5	145	15	20	1167	951	93	80	8	62	5	11	0	0	444	669	74	32	29	13	4553	933	38	321	136	371	48	238	17	19	26	31	23	0	0	12	0	22	44994	1.17157
18	Bacteria	Firmicutes	Bacilli	662	1111	536	991	674	1358	266	1188	328	3569	238	2012	244	1129	394	2476	318	490	221	467	859	1154	453	293	829	1005	772	837	354	454	544	1275	450	712	686	932	775	1550	705	1044	1905	965	838	854	38917	1.01333
19	Others	Others	Others	14209	17838	13779	16349	12853	14466	10232	7004	10037	9895	8900	12020	8382	35789	10268	12337	6056	8572	5204	8468	9332	10297	7057	4810	6438	17864	5615	16646	6762	22482	10019	24089	16092	15522	7763	12366	8855	17014	7504	15027	7661	9041	7853	6695	515462	13.4218
		F: refer to surface; S: refer to sub-surface
